# Supplementary material for: Determination of Biogenic Amine Level Variations upon Storage, in Chicken Breast Coated with Edible Protective Film
Source: MDPI journal article supplement (doi:10.3390/foods13070985), 2024-03-23
Supplement: s1 [file s1]

# Determination of Biogenic Amine Level Variations upon Storage, in Chicken Breast Coated with Edible Protective Film

Aneta Jastrzębska <sup>1,\*</sup>, Anna Kmieciak <sup>2</sup>, Zuzanna Gralak <sup>1</sup>, Kamil Brzuzy <sup>1</sup>, Jacek Nowaczyk <sup>3</sup>, Marcin Cichosz <sup>4</sup>, Marek P. Krzemiński <sup>2</sup> and Edward Szłyk <sup>1</sup>

<sup>1</sup> Department of Analytical Chemistry and Applied Spectroscopy, Faculty of Chemistry, NCU in Toruń, 87-100 Toruń, Poland; 302301@stud.umk.pl (Z.G.); 302298@stud.umk.pl (K.B.); eszlyk@umk.pl (E.S.)

<sup>2</sup> Department of Organic Chemistry, Faculty of Chemistry, NCU in Toruń, 87-100 Toruń, Poland; akmieciak@umk.pl (A.K.); [mkrzem@umk.pl](mailto:mkrzem@umk.pl) (M.P.K.)

<sup>3</sup> Department of Physical Chemistry and Polymer Physical Chemistry, Faculty of Chemistry, NCU in Toruń, 87-100 Toruń, Poland; janowa@umk.pl

<sup>4</sup> Department of Chemical Technology, Faculty of Chemistry, NCU in Toruń, 87-100 Toruń, Poland; chemik@chem.umk.pl

\* Correspondence: aj@umk.pl

## Supporting materials

**Table S1.** Results of the microbial counts (average value  $\pm$  standard deviation) [ $\log_{10}\text{CFU}\cdot\text{g}^{-1}$ ] in meat samples after 48 and 96 hours of storage at 4°C

|         | start           | 48 hours        | 96 hours         |
|---------|-----------------|-----------------|------------------|
| CM      | 7.25 $\pm$ 0.27 | 9.45 $\pm$ 0.24 | 10.74 $\pm$ 0.13 |
| M-EF0.0 | -               | 8.78 $\pm$ 0.30 | 9.81 $\pm$ 0.17  |
| M-EF0.r | -               | 8.07 $\pm$ 0.14 | 9.96 $\pm$ 0.18  |

where: **CM** - control meat, **M-EF0.0** - meat samples with emulsion coating, **M-EF0.r** - meat samples with emulsion coating and RA.

**Table S2.** Results of the total biogenic amines (TBAs) and TBARS contents (average value  $\pm$  standard deviation) [ $\text{mg}\cdot\text{kg}^{-1}$ ] in meat samples during storage at 4°C

|         | start                 | 24 hours              | 48 hours              | 72 hours              | 96 hours              |
|---------|-----------------------|-----------------------|-----------------------|-----------------------|-----------------------|
| TBARS   |                       |                       |                       |                       |                       |
| CM      | 0.0785<br>$\pm$ 0.004 | 0.0833<br>$\pm$ 0.004 | 0.0854<br>$\pm$ 0.006 | 0.1001<br>$\pm$ 0.002 | 0.124<br>$\pm$ 0.004  |
| M-EF0.0 | -                     | 0.0708<br>$\pm$ 0.005 | 0.0782<br>$\pm$ 0.001 | 0.0862<br>$\pm$ 0.002 | 0.0957<br>$\pm$ 0.006 |
| M-EF0.r | -                     | 0.0781<br>$\pm$ 0.008 | 0.0767<br>$\pm$ 0.003 | 0.0811<br>$\pm$ 0.003 | 0.0904<br>$\pm$ 0.005 |
| SBAs    |                       |                       |                       |                       |                       |
| CM      | 40.78 $\pm$ 1.87      | 45.01 $\pm$ 1.87      | 62.79 $\pm$ 0.73      | 71.30 $\pm$ 0.23      | 121.02 $\pm$ 0.34     |
| M-EF0.0 | -                     | 42.79 $\pm$ 0.36      | 60.00 $\pm$ 0.32      | 71.01 $\pm$ 0.28      | 112.68 $\pm$ 0.78     |
| M-EF0.r | -                     | 40.39 $\pm$ 0.42      | 46.68 $\pm$ 0.26      | 65.88 $\pm$ 0.51      | 103.92 $\pm$ 0.40     |

where: **CM** - control meat, **M-EF0.0** - meat samples with emulsion coating, **M-EF0.r** - meat samples with emulsion coating and RA; TBARS - 2- thiobarbituric acid reactive substances index; SBAs - calculated sum of all BAs
